# Supplementary material
Source: Copernicus journal article supplement (doi:10.5194/egusphere-2026-1832)
Supplement: Supplementary file 1 [file egusphere-2026-1832-supplement.pdf]

1 Supplement Materials for

2 **Strategic Design of Methane Observation Networks to Improve**  
3 **Emission Estimates: A Case Study in Africa**

4 Hui Li<sup>1\*</sup>, Philippe Ciais<sup>1</sup>, Frédéric Chevallier<sup>1</sup>, Bo Zheng<sup>2,3</sup>, Paul I. Palmer<sup>4</sup>, Frank Hase<sup>5</sup>,  
5 Morgan Lopez<sup>1</sup>, Elsa M Ordway<sup>6</sup>, Shushi Peng<sup>7</sup>, Danielle Monteverde<sup>8</sup>, Michel Ramonet<sup>1</sup>,  
6 Jason Michael St Clair<sup>9</sup>, Le Bienfaiteur Sagang<sup>10</sup>, Benjamin Poulter<sup>11</sup>

7 <sup>1</sup>Laboratoire des Sciences du Climat et de l'Environnement, LSCE/IPSL, CEA-CNRS-UVSQ, Université  
8 Paris-Saclay, F-91191 Gif-sur-Yvette, France.

9 <sup>2</sup>Shenzhen Key Laboratory of Ecological Remediation and Carbon Sequestration, Institute of Environment  
10 and Ecology, Tsinghua Shenzhen International Graduate School, Tsinghua University, Shenzhen 518055,  
11 China.

12 <sup>3</sup>State Environmental Protection Key Laboratory of Sources and Control of Air Pollution Complex, Beijing  
13 100084, China.

14 <sup>4</sup>National Centre for Earth Observation, University of Edinburgh, Edinburgh, EH9 3FF, UK.

15 <sup>5</sup>Institute of Meteorology and Climate Research (IMK-ASF), Karlsruhe Institute of Technology (KIT), 76344  
16 Eggenstein-Leopoldshafen, Germany.

17 <sup>6</sup>Department of Ecology and Evolutionary Biology and Institute of the Environment and Sustainability,  
18 University of California, Los Angeles, Los Angeles, California, USA.

19 <sup>7</sup>Institute of Carbon Neutrality, Sino-French Institute for Earth System Science, College of Urban and  
20 Environmental Sciences, and Laboratory for Earth Surface Processes, Peking University, Beijing, China.

21 <sup>8</sup>Spark Climate Solutions, Covina, CA, 91723, USA.

22 <sup>9</sup>NASA Goddard Space Flight Center, Greenbelt, MD, USA.

23 <sup>10</sup>Institute of the Environment and Sustainability, University of California, Los Angeles, Los Angeles, CA,  
24 USA.

25 <sup>11</sup>Spark Climate Solutions, San Francisco, CA, USA.

26 *Correspondence to:* Hui Li (hui.li@lsce.ipsl.fr)

27

28 **This file includes:**

29 Figures S1-S12

30 Tables S1-S5

31

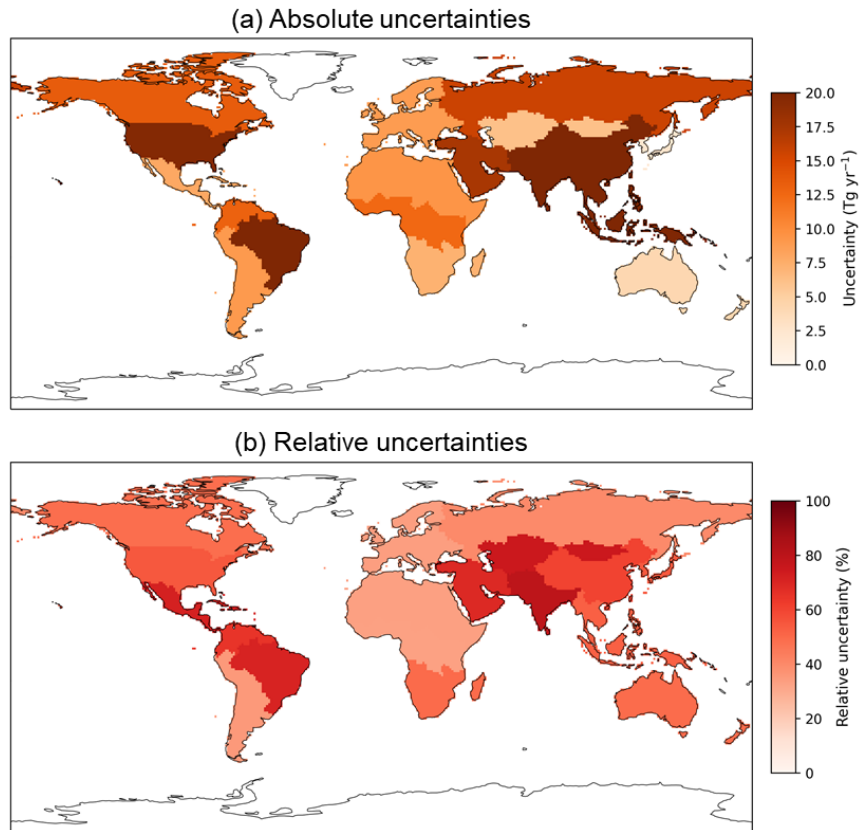

32

33 **Figure S1. Regional annual prior uncertainty budget for CH<sub>4</sub> emissions derived from the**  
 34 **prior error covariance matrix  $\mathbf{B}$  used in this study.** The uncertainty for each region is calculated  
 35 as  $\sigma^2 = \mathbf{I}^T \mathbf{B} \mathbf{I}$ , where  $\mathbf{I}$  represents the vector converting grid-scale emissions into regional totals. The  
 36 upper panel shows the absolute annual uncertainty (Tg yr<sup>-1</sup>), and the lower panel shows the  
 37 corresponding relative uncertainty (%), defined as the ratio of the uncertainty to the regional annual  
 38 prior emissions.

39

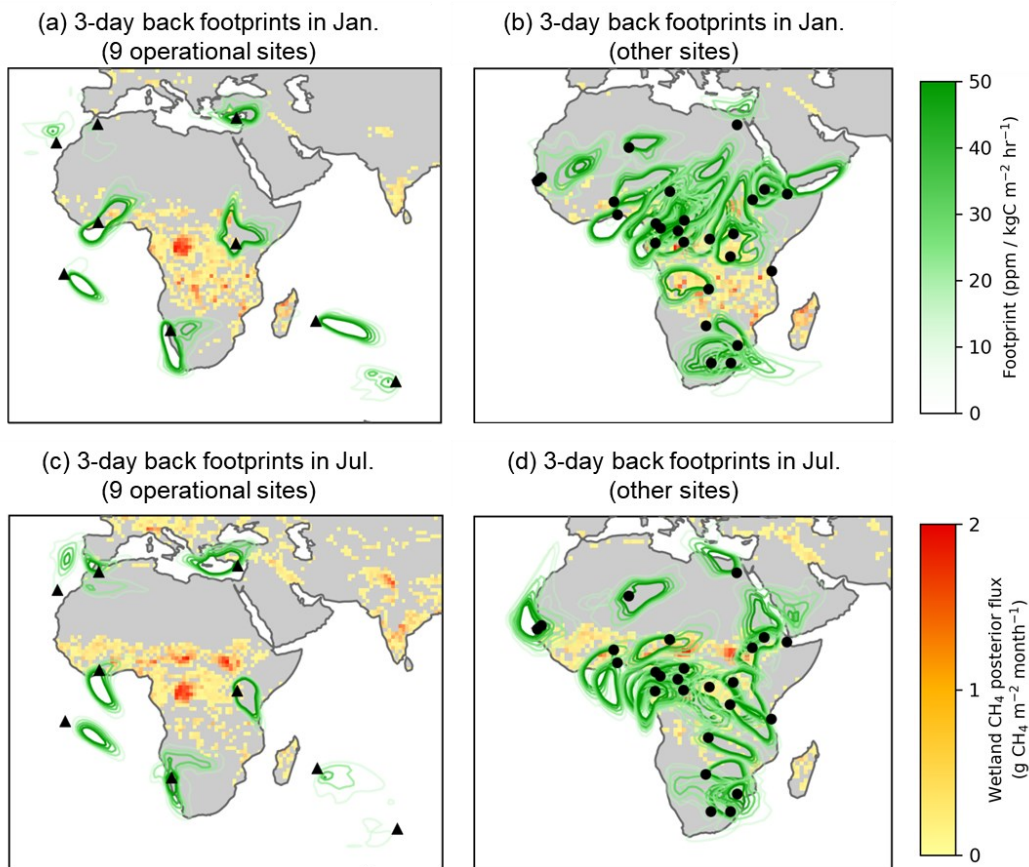

40

41 **Figure S2. Spatial distribution of 3-day backward transport footprints over Africa for**  
 42 **January (top row) and July (bottom row).** (a) and (c) show footprints associated with the 9  
 43 operational sites, while (b) and (d) correspond to other 25 sites. Green contours represent footprint  
 44 sensitivities ( $\text{ppm kgC m}^{-2} \text{hr}^{-1}$ ), indicating the influence of surface methane emissions on the  
 45 column observations. The background shows wetland  $\text{CH}_4$  emissions ( $\text{g CH}_4 \text{m}^{-2} \text{month}^{-1}$ ),  
 46 emissions less than  $0.05 \text{g CH}_4 \text{m}^{-2} \text{month}^{-1}$  are gray-shaded for clarity. Black dots (triangles and  
 47 circles) denote the locations of surface observation sites.

48

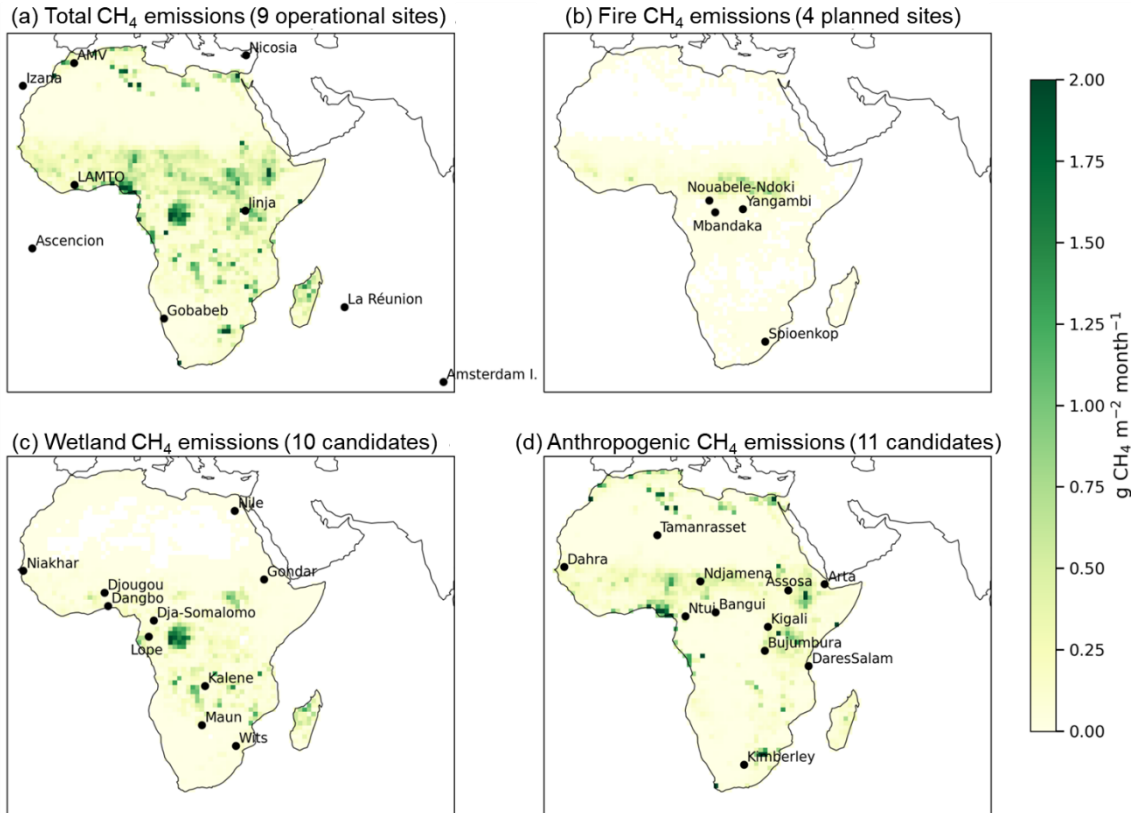

49

50 **Figure S3. Sectoral CH<sub>4</sub> emissions and observation coverage over Africa in January.** (a) total  
 51 CH<sub>4</sub> emissions with current 9 operational sites (La Réunion, Nicosia, Ascencion, Izaña, LAMTO,  
 52 AMV, Gobabeb, Jinja, Amsterdam Island); (b) fire CH<sub>4</sub> emissions with 4 planned observation sites  
 53 (Yangambi, Mbandaka, Nouabele-Ndoki, Spienkop); (c) wetland CH<sub>4</sub> emissions with 10  
 54 candidate sites (Dja-Somalomo, Wits, Niakhar, Nile, Djougou, Dangbo, Kalene, Gondar, Lope,  
 55 Maun); and (d) anthropogenic CH<sub>4</sub> emissions with the remaining 11 candidate sites (Dahra, Ntui,  
 56 Kigali, Bujumbura, Arta, Assosa, Bangui, Kimberley, Tamanrasset, Ndjamena, DaresSalam).

57

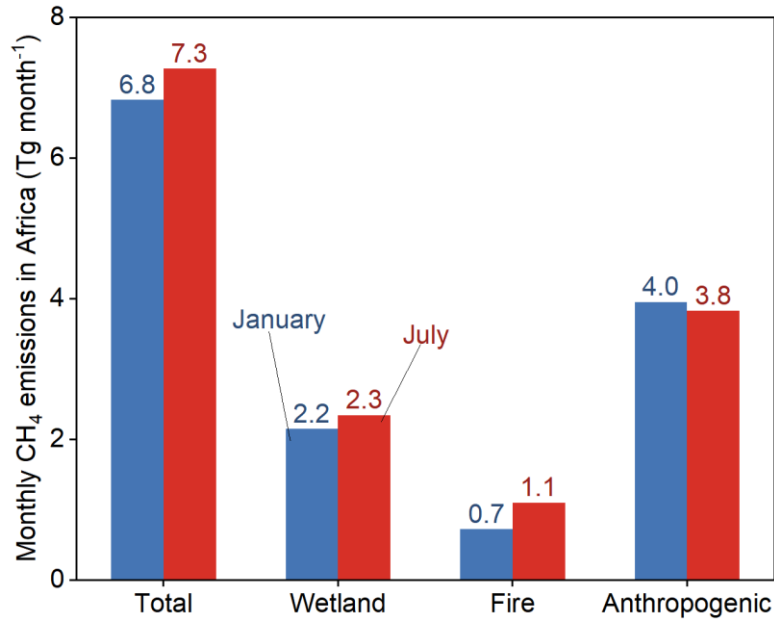

58

59 **Figure S4. Comparison of African CH<sub>4</sub> emissions across sectors between January and July in**  
60 **2023.**

61

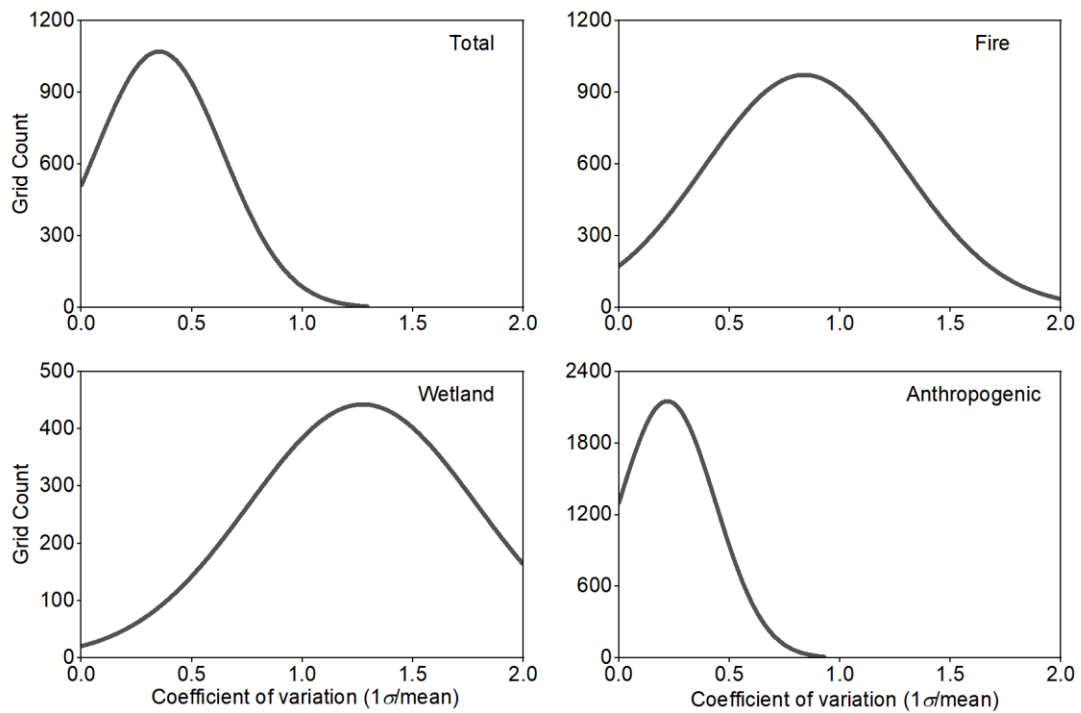

62

63 **Figure S5. The coefficient of variation for sectoral CH<sub>4</sub> prior emissions adopted in this study.**

64

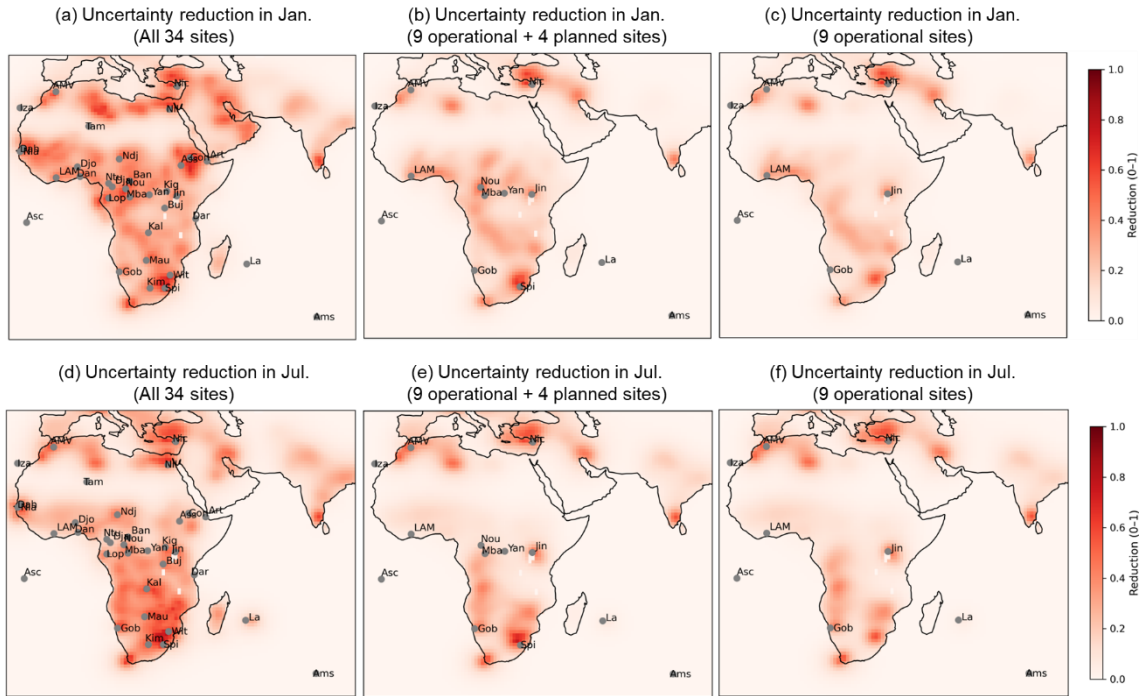

65

66 **Figure S6. Spatial distribution of uncertainty reduction for total CH<sub>4</sub> emissions under**  
 67 **different site deployments and months.**

68

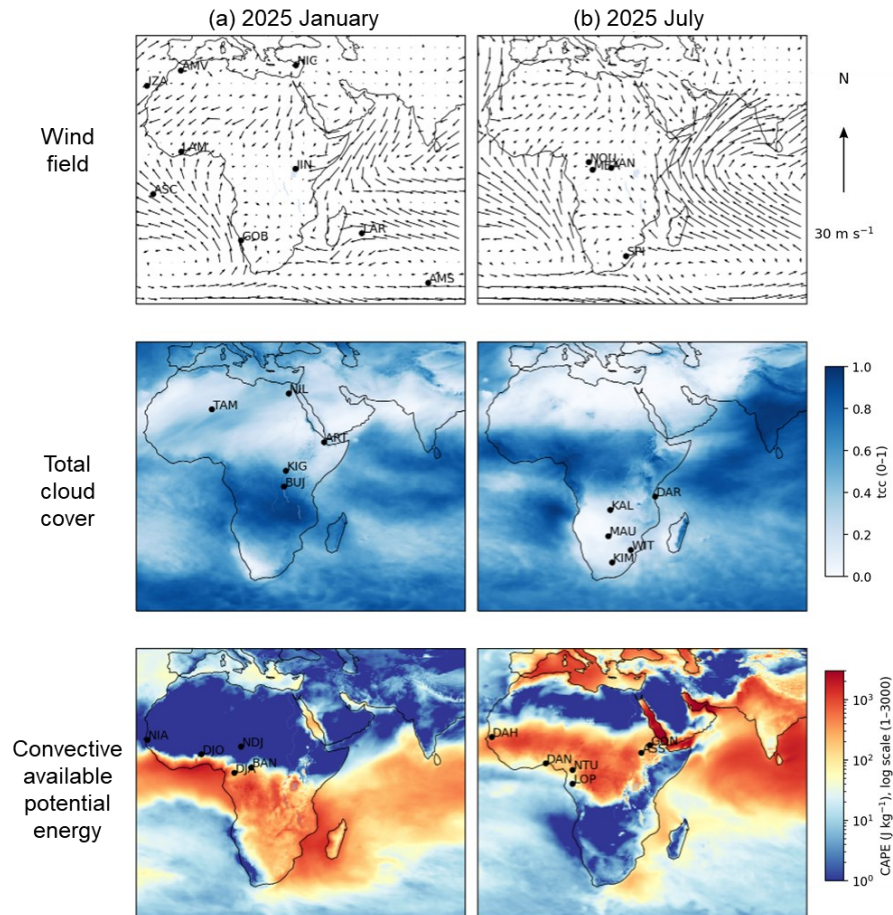

69

70 **Figure S7. Meteorological conditions over Africa in January (left column) and July (right**  
 71 **column) 2025.** The top row shows 10-m wind fields, the middle row presents total cloud cover  
 72 (TCC), and the bottom row displays convective available potential energy (CAPE). Black dots  
 73 indicate 34 sites listed in Table S2, with their first three letters for clarity here. Data are from ERA5  
 74 dataset (<https://cds.climate.copernicus.eu/datasets>).

75

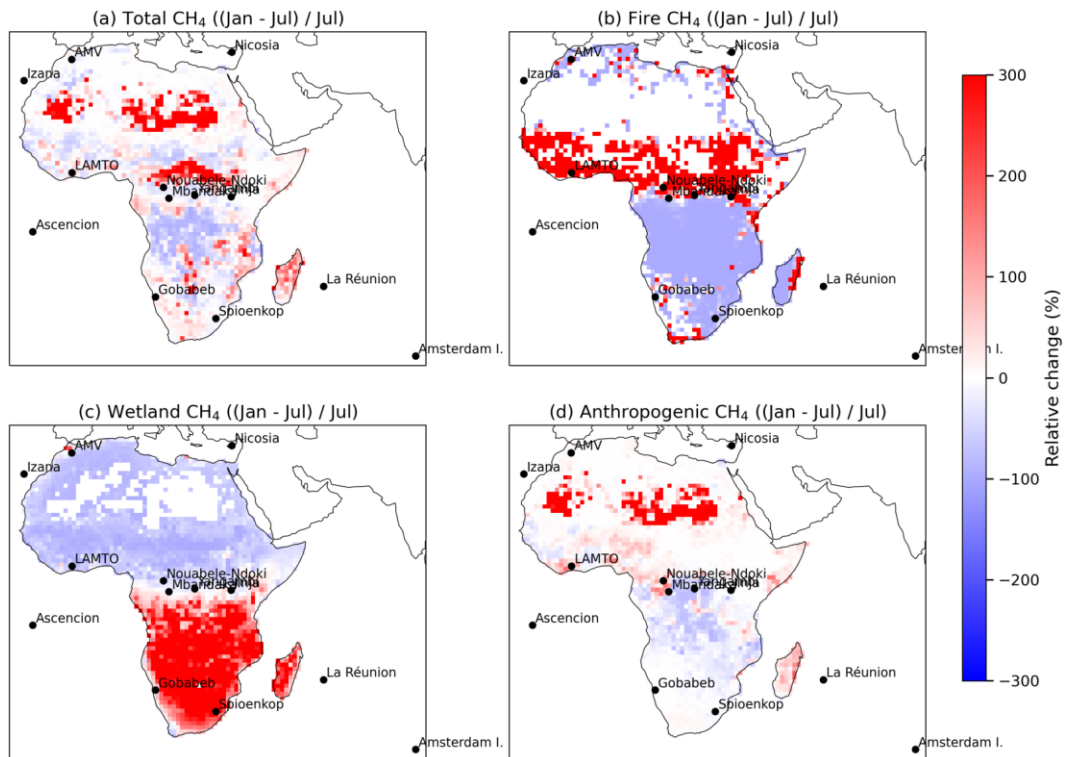

76

77 **Figure S8. Spatial difference between January and July for (a) total; (b) fire; (c) wetland; and**  
 78 **(d) anthropogenic CH<sub>4</sub> emissions.** Here presents the relative difference calculated as (January -  
 79 July)/July. Dots denote 9 operational and 4 planned sites.

80

81

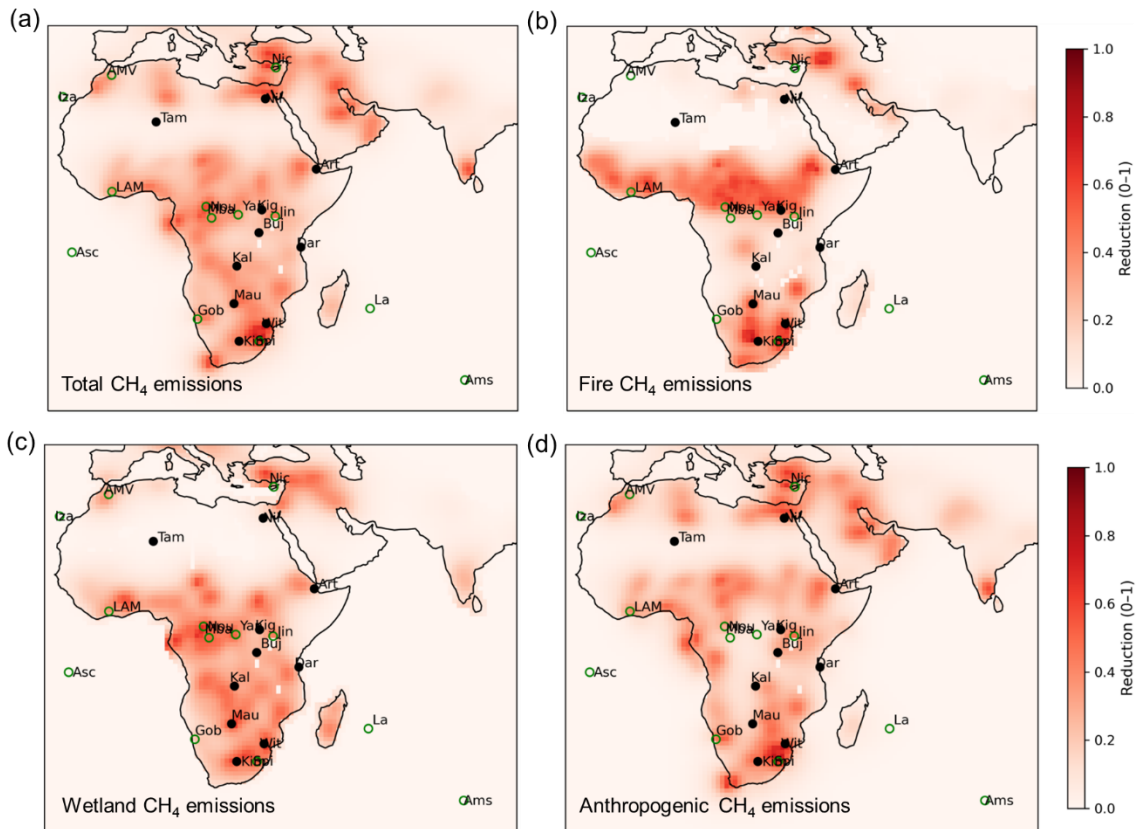

82

83 **Figure S9. Spatial distribution of uncertainty reduction for (a) total; (b) fire; (c) wetland; and**  
 84 **(d) anthropogenic CH<sub>4</sub> emissions with the 10 optimal sites configuration in 2025 January.** The  
 85 10 optimal sites in this case include Nile, Tamanrasset, Arta, Kigali, Bujumbura, DaresSalam,  
 86 Kalene, Maun, Wits, and Kimberley. All the site names are abbreviated with first three letters. The  
 87 green open circles are 9 operational and 4 planned sites, and the closed black circles are optimized  
 88 new 10 sites.

89

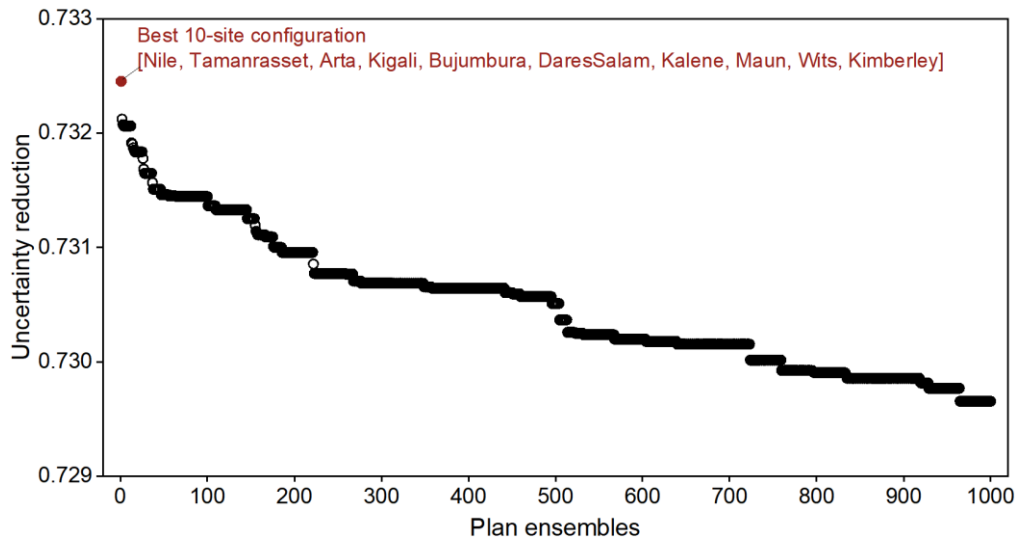

90

91 **Figure S10. The best site configuration selection among 10-site plans (top 1000 plans are**  
92 **plotted).**

93

94

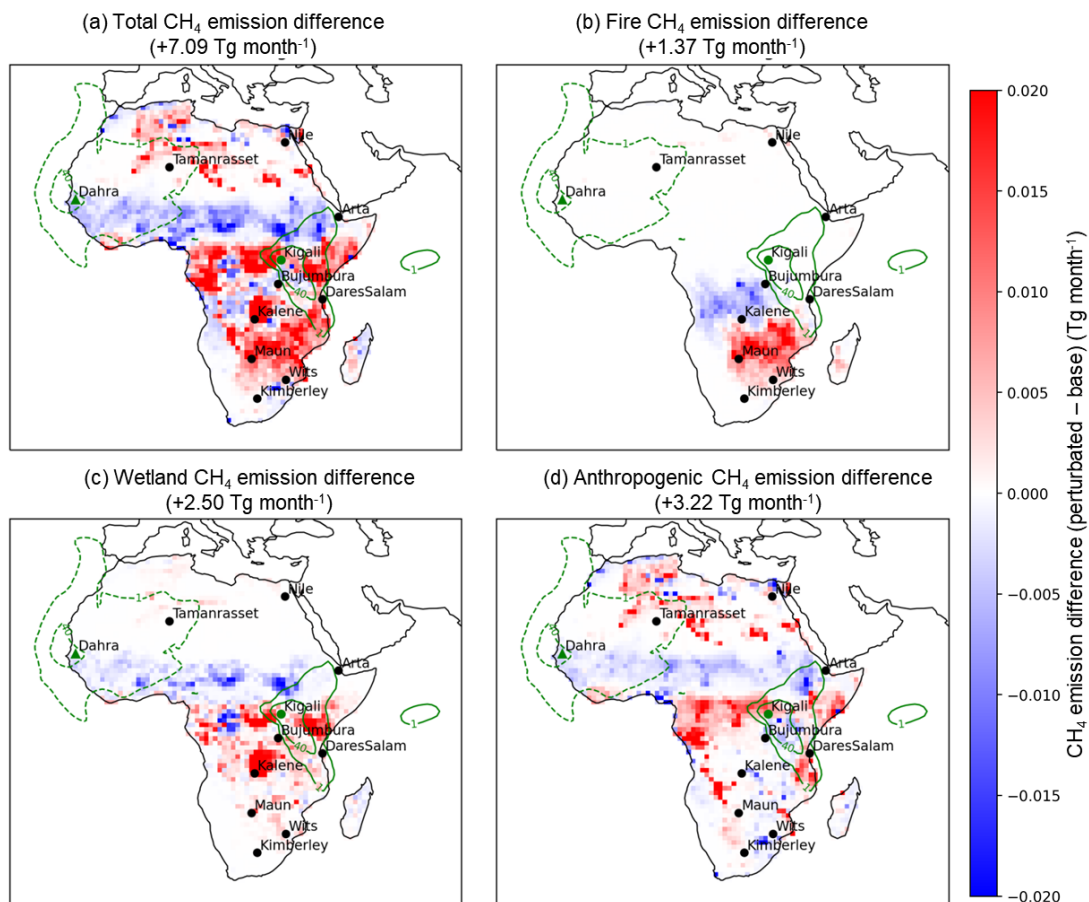

95

96 **Figure S11. Spatial differences in July CH<sub>4</sub> prior emissions between the perturbed prior and**  
 97 **the base prior over Africa.** Panels show (a) total, (b) fire, (c) wetland, and (d) anthropogenic CH<sub>4</sub>.  
 98 Colors denote the grid-cell emission difference (perturbed-base). Black markers indicate optimal  
 99 selected sites common to both priors, green circles indicate sites included only in base prior (Kigali),  
 100 and green triangles indicate sites included only in perturbed prior test (Dahra). Green contour lines  
 101 overlay the 3-day footprints for sites unique to each condition (solid for base prior; dashed for  
 102 perturbed prior test), with numbers denoting the corresponding footprint values.

103

104

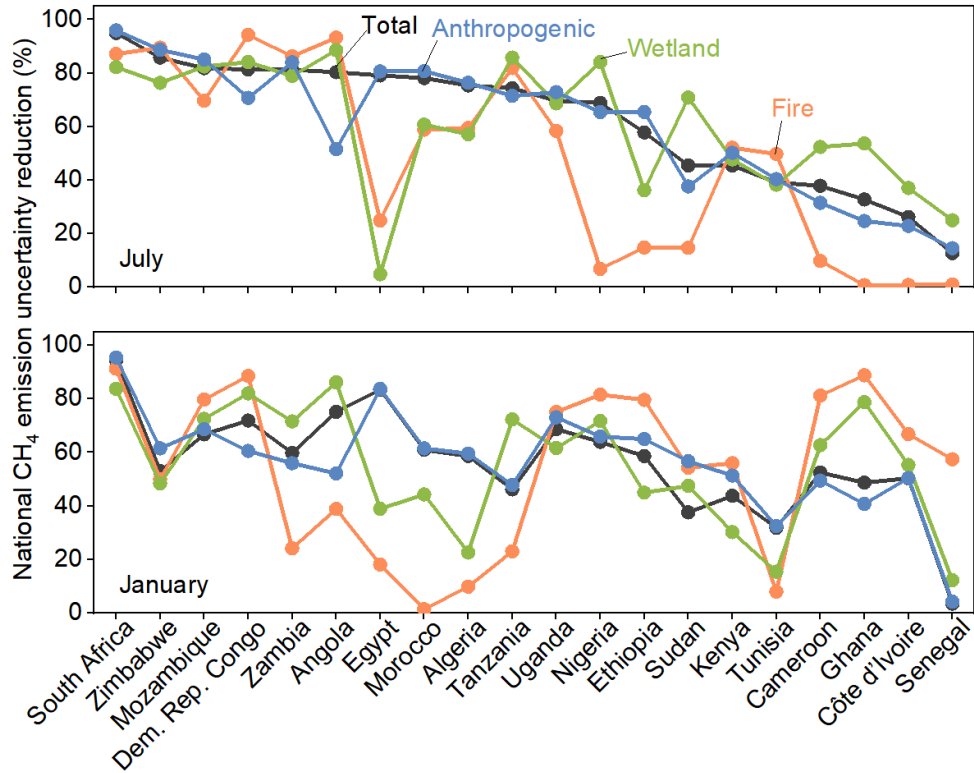

105

106 **Figure S12. Country-specific CH<sub>4</sub> emission uncertainty reduction with the 10 optimal site**  
 107 **configurations.** Only 20 countries are presented here for clarity, with more country results listed  
 108 in Table S5.

109

110 **Table S1. The database used as CH<sub>4</sub> priors in 2023 in this study.**

| Sectors       | Database                                 | Source                                                                                                                    |
|---------------|------------------------------------------|---------------------------------------------------------------------------------------------------------------------------|
| Fire          | GFEDv4                                   | <a href="https://www.globalfiredata.org/">https://www.globalfiredata.org/</a>                                             |
|               | GFEDv5                                   |                                                                                                                           |
|               | GFAS                                     |                                                                                                                           |
| Wetland       | ORCHIDEE                                 | Peng et al. (2022) and Liu et al. (2025)                                                                                  |
|               | LPJ-EOSIM                                |                                                                                                                           |
|               | DLEM                                     | Ciais et al. (2026)                                                                                                       |
|               | FLUXNET-CH <sub>4</sub>                  |                                                                                                                           |
| Anthropogenic | CEDS v2025_04_18                         | <a href="https://github.com/JGCRI/CEDS">https://github.com/JGCRI/CEDS</a>                                                 |
|               | EDGAR v2024                              | <a href="https://edgar.jrc.ec.europa.eu/emissions_data_and_maps">https://edgar.jrc.ec.europa.eu/emissions_data_and_ma</a> |
|               | EDGAR v2025                              |                                                                                                                           |
| Total         | Sum of anthropogenic and natural sources |                                                                                                                           |

111

112

113  
114

**Table S2. The XCH<sub>4</sub> site pool in Africa in this study, with spatial distribution presented in Fig. 3.**

| Country              | Site                    | Lat      | Lon      | Status                                                                                                                                                                                                                                                                                     |
|----------------------|-------------------------|----------|----------|--------------------------------------------------------------------------------------------------------------------------------------------------------------------------------------------------------------------------------------------------------------------------------------------|
| France               | La Réunion <sup>#</sup> | -21.0833 | 55.3917  | Operational FTIR sites<br>• ( <sup>#</sup> are sites within TCCON network)<br>• (*are sites operated by the Laboratory for Climate and Environmental Sciences)<br>• (Gobabeb is operated by the Karlsruhe Institute of Technology)<br>• (Jinja is operated by the University of Leicester) |
| Cyprus               | Nicosia <sup>#</sup>    | 35.1410  | 33.3800  |                                                                                                                                                                                                                                                                                            |
| UK                   | Ascencion <sup>#</sup>  | -7.9667  | -14.4000 |                                                                                                                                                                                                                                                                                            |
| Spain                | Izaña <sup>#</sup>      | 28.3090  | -16.4990 |                                                                                                                                                                                                                                                                                            |
| Côte d'Ivoire        | LAMTO*                  | 6.2244   | -5.0278  |                                                                                                                                                                                                                                                                                            |
| Maroc                | AMV*                    | 33.4062  | -5.1033  |                                                                                                                                                                                                                                                                                            |
| France               | Amsterdam I. *          | -37.7976 | 77.5725  |                                                                                                                                                                                                                                                                                            |
| Namibia              | Gobabeb                 | -23.5622 | 15.0409  |                                                                                                                                                                                                                                                                                            |
| Uganda               | Jinja                   | 0.4165   | 33.2070  |                                                                                                                                                                                                                                                                                            |
| Congo                | Yangambi                | 0.8100   | 24.5000  |                                                                                                                                                                                                                                                                                            |
| Congo                | Mbandaka                | 0.0500   | 18.3000  |                                                                                                                                                                                                                                                                                            |
| Dem. Rep. Congo      | Nouabele-Ndoki          | 2.7000   | 17.0000  |                                                                                                                                                                                                                                                                                            |
| South Africa         | Spioenkop               | -28.7132 | 29.5086  |                                                                                                                                                                                                                                                                                            |
| Cameroon             | Dja-Somalomo            | 3.3738   | 12.7331  | Candidates                                                                                                                                                                                                                                                                                 |
| Algeria              | Tamanrasset             | 22.47    | 5.31     |                                                                                                                                                                                                                                                                                            |
| Chad                 | Ndjamena                | 12.1265  | 14.9997  |                                                                                                                                                                                                                                                                                            |
| Tanzania             | DaresSalam              | -6.7808  | 39.20369 |                                                                                                                                                                                                                                                                                            |
| Cameroon             | Ntui                    | 4.4000   | 11.6200  |                                                                                                                                                                                                                                                                                            |
| Senegal              | Niakhar                 | 14.5000  | -16.4000 |                                                                                                                                                                                                                                                                                            |
| Senegal              | Dahra                   | 15.3600  | -15.4800 |                                                                                                                                                                                                                                                                                            |
| Benin                | Djougou                 | 9.6500   | 1.7333   |                                                                                                                                                                                                                                                                                            |
| Benin                | Dangbo                  | 6.6014   | 2.5465   |                                                                                                                                                                                                                                                                                            |
| Ethiopia             | Assosa                  | 10.1000  | 34.6000  |                                                                                                                                                                                                                                                                                            |
| Ethiopia             | Gondar                  | 12.6000  | 37.4500  |                                                                                                                                                                                                                                                                                            |
| Djibouti             | Arta                    | 11.5000  | 42.8000  |                                                                                                                                                                                                                                                                                            |
| Rwanda               | Kigali                  | 1.9617   | 30.0642  |                                                                                                                                                                                                                                                                                            |
| Botswana             | Maun                    | -19.9022 | 23.5283  |                                                                                                                                                                                                                                                                                            |
| Egypt                | Nile                    | 27.8800  | 30.8900  |                                                                                                                                                                                                                                                                                            |
| Burundi              | Bujumbura               | -3.3600  | 29.3700  |                                                                                                                                                                                                                                                                                            |
| Zambia               | Kalene                  | -11.1755 | 24.1917  |                                                                                                                                                                                                                                                                                            |
| Gabon                | Lope                    | -0.2000  | 11.6000  |                                                                                                                                                                                                                                                                                            |
| Central African Rep. | Bangui                  | 5.2000   | 18.4000  |                                                                                                                                                                                                                                                                                            |
| South Africa         | Kimberley               | -28.7300 | 24.7540  |                                                                                                                                                                                                                                                                                            |
| South Africa         | Wits                    | -24.5530 | 31.0970  |                                                                                                                                                                                                                                                                                            |

115

116 **Table S3. The parameter settings in the site-design system.**

|                                                                       | <b>Parameters</b>             | <b>Default</b> | <b>Definition and description</b>                                                                                                                                                                                                                                                                           |
|-----------------------------------------------------------------------|-------------------------------|----------------|-------------------------------------------------------------------------------------------------------------------------------------------------------------------------------------------------------------------------------------------------------------------------------------------------------------|
| General settings                                                      | MONTH                         | 01/07          | - Target month for the optimization. All calculations are performed independently for each month to account for seasonal variability in emissions, transport, cloud cover, and observational sensitivity.                                                                                                   |
|                                                                       | $\sigma_{\text{obs}}$         | 5 ppb          | - Assumed observational uncertainty for each site and valid day.                                                                                                                                                                                                                                            |
| Cloud screening                                                       | Cloud fraction (CF) threshold | 0.5            | - ERA5 cloud fraction threshold applied to filter out days with excessive cloud cover, reducing effective observational sensitivity.                                                                                                                                                                        |
|                                                                       | Minimum valid fraction        | 0.1            | - Minimum fraction of cloud-free days required for a site to be considered active within a given month.                                                                                                                                                                                                     |
| Optimization of the number of additional sites and site configuration | $\varepsilon$                 | 0.6%           | - Threshold for the marginal gain in ensemble-mean uncertainty reduction. The optimal number of additional sites $n^*$ is defined as the smallest $n$ for which the incremental relative reduction $\Delta P(n)$ falls below $\varepsilon$ , indicating diminishing returns from further network expansion. |
|                                                                       | <b>B</b><br>(Sector-specific) | -              | - For sectoral uncertainty reduction, the prior covariance matrix <b>B</b> is modified to reflect sector-specific uncertainties, while the transport sensitivity matrix <b>H</b> is assumed to be identical to that for total emissions.                                                                    |

117

118

119 **Table S4. The sensitivity tests on parameters.**

| Parameters                         | Test Name            | Test Value | Optimal Site Number (10) | Optimal Site Configuration                                                                                |                                                                                                                                                                       |
|------------------------------------|----------------------|------------|--------------------------|-----------------------------------------------------------------------------------------------------------|-----------------------------------------------------------------------------------------------------------------------------------------------------------------------|
|                                    |                      |            |                          | [Arta, Bujumbura, DaresSalam, Kalene, Kigali, Kimberley, Maun, Nile, Tamanrasset, Wits]                   |                                                                                                                                                                       |
| Observation uncertainty (ppb) (5)  | R1                   | 1          | 10                       | - [Arta, Bujumbura, DaresSalam, Kalene, Kigali, Kimberley, Maun, Nile, Tamanrasset, Wit]                  |                                                                                                                                                                       |
|                                    | R10                  | 10         | 10                       | - [Arta, Bujumbura, DaresSalam, Kalene, Kigali, Kimberley, Maun, Nile, Tamanrasset, Wit]                  |                                                                                                                                                                       |
|                                    | R100                 | 100        | 12                       | - [Arta, Bujumbura, Dahra, DaresSalam, Kalene, Kigali, Kimberley, Maun, Niakhar, Nile, Tamanrasset, Wits] |                                                                                                                                                                       |
|                                    | R1000                | 1000       | 21                       | - All candidates                                                                                          |                                                                                                                                                                       |
| Cloud effect                       | Cloud fraction (0.5) | CF0.3      | 0.3                      | 19                                                                                                        | - [Arta, Assosa, Bangui, Bujumbura, Dahra, Dangbo, DaresSalam, Dja-Somalomo, Kalene, Kigali, Kimberley, Lope, Maun, Ndjamena, Niakhar, Nile, Ntui, Tamanrasset, Wits] |
|                                    |                      | CF0.4      | 0.4                      | 13                                                                                                        | - [Arta, Bangui, Bujumbura, Dahra, Dangbo, Kalene, Kigali, Kimberley, Maun, Niakhar, Nile, Tamanrasset, Wits]                                                         |
|                                    | CF0.6                | 0.6        | 2                        | - [DaresSalam, Nile]                                                                                      |                                                                                                                                                                       |
|                                    | CF0.7                | 0.7        | 2                        | - [Arta, DaresSalam]                                                                                      |                                                                                                                                                                       |
| Minimum valid fraction (0.1)       | VF0                  | VF0        | 0                        | 13                                                                                                        | - [Arta, Assosa, Bujumbura, Dahra, Dja-Somalomo, Kalene, Kigali, Kimberley, Maun, Niakhar, Nile, Ntui, Wits]                                                          |
|                                    |                      | VF0.2      | 0.2                      | 4                                                                                                         | - [DaresSalam, Kalene, Maun, Nile]                                                                                                                                    |
|                                    |                      | VF0.3      | 0.3                      | 1                                                                                                         | - [DaresSalam]                                                                                                                                                        |
|                                    |                      | VF0.4      | 0.4                      | 1                                                                                                         | - [DaresSalam]                                                                                                                                                        |
| System Parameter $\epsilon$ (0.6%) | $\epsilon_{0.5\%}$   | 0.5%       | 0.5%                     | 14                                                                                                        | - [Arta, Bujumbura, Dahra, DaresSalam, Dja-Somalomo, Kalene, Kigali, Kimberley, Lope, Maun, Niakhar, Nile, Tamanrasset, Wits]                                         |
|                                    |                      | 0.7%       | 0.7%                     | 7                                                                                                         | - [Bujumbura, DaresSalam, Kalene, Kimberley, Maun, Nile, Wits]                                                                                                        |

\* The numbers below each parameter are the corresponding default values.

120  
121

Table S5. National CH<sub>4</sub> uncertainty reduction (%) with ten optimal site configurations.

| Country list         | July  |      |         |               | Jan   |      |         |               |
|----------------------|-------|------|---------|---------------|-------|------|---------|---------------|
|                      | Total | Fire | Wetland | Anthropogenic | Total | Fire | Wetland | Anthropogenic |
| Angola               | 80    | 93   | 89      | 52            | 75    | 39   | 86      | 52            |
| Algeria              | 75    | 60   | 57      | 76            | 59    | 10   | 23      | 60            |
| South Africa         | 95    | 87   | 82      | 96            | 94    | 91   | 84      | 95            |
| Zimbabwe             | 86    | 90   | 76      | 89            | 53    | 50   | 48      | 61            |
| Mozambique           | 82    | 70   | 82      | 85            | 67    | 80   | 72      | 69            |
| Dem. Rep. Congo      | 81    | 94   | 84      | 71            | 72    | 89   | 82      | 61            |
| Zambia               | 81    | 86   | 79      | 84            | 60    | 24   | 72      | 56            |
| Madagascar           | 52    | 56   | 61      | 58            | 34    | 21   | 54      | 21            |
| Tanzania             | 74    | 82   | 86      | 71            | 46    | 23   | 72      | 48            |
| Gambia               | 9     | 1    | 18      | 10            | 2     | 41   | 8       | 2             |
| Botswana             | 84    | 92   | 84      | 83            | 65    | 85   | 78      | 65            |
| Egypt                | 79    | 25   | 5       | 81            | 83    | 18   | 39      | 84            |
| Senegal              | 13    | 1    | 25      | 15            | 3     | 57   | 12      | 4             |
| S. Sudan             | 47    | 12   | 76      | 25            | 64    | 88   | 83      | 43            |
| Namibia              | 83    | 80   | 69      | 88            | 54    | 34   | 56      | 61            |
| Guinea-Bissau        | 11    | 1    | 19      | 12            | 2     | 40   | 9       | 3             |
| Congo                | 65    | 74   | 77      | 56            | 72    | 55   | 83      | 59            |
| Morocco              | 78    | 59   | 61      | 81            | 61    | 1    | 44      | 61            |
| Libya                | 41    | 8    | 4       | 45            | 38    | 29   | 3       | 44            |
| Chad                 | 60    | 19   | 73      | 60            | 75    | 86   | 76      | 83            |
| Sudan                | 45    | 15   | 71      | 38            | 38    | 54   | 47      | 57            |
| Mali                 | 42    | 3    | 52      | 42            | 27    | 58   | 26      | 32            |
| Malawi               | 64    | 47   | 62      | 70            | 49    | 48   | 54      | 49            |
| Lesotho              | 62    | 72   | 48      | 64            | 55    | 54   | 51      | 57            |
| Eswatini             | 63    | 63   | 60      | 64            | 57    | 63   | 51      | 58            |
| Uganda               | 70    | 58   | 69      | 73            | 69    | 75   | 62      | 73            |
| Guinea               | 32    | 1    | 46      | 31            | 11    | 80   | 31      | 9             |
| Burkina Faso         | 40    | 2    | 54      | 33            | 34    | 40   | 29      | 41            |
| Nigeria              | 69    | 7    | 84      | 65            | 64    | 82   | 72      | 66            |
| Rwanda               | 49    | 53   | 43      | 53            | 28    | 20   | 30      | 37            |
| Niger                | 40    | 12   | 48      | 39            | 29    | 30   | 22      | 39            |
| Burundi              | 52    | 61   | 37      | 61            | 23    | 12   | 29      | 33            |
| Central African Rep. | 45    | 12   | 67      | 26            | 53    | 89   | 59      | 56            |
| Benin                | 37    | 1    | 43      | 39            | 50    | 44   | 41      | 51            |
| Mauritania           | 14    | 1    | 26      | 16            | 5     | 32   | 11      | 6             |
| Ghana                | 33    | 1    | 54      | 25            | 49    | 89   | 79      | 41            |
| Cameroon             | 38    | 10   | 52      | 31            | 52    | 81   | 63      | 49            |
| Kenya                | 45    | 52   | 48      | 50            | 44    | 56   | 30      | 51            |
| Togo                 | 31    | 1    | 40      | 30            | 42    | 53   | 52      | 39            |
| Ethiopia             | 58    | 15   | 36      | 66            | 59    | 80   | 45      | 65            |
| Tunisia              | 39    | 50   | 38      | 40            | 32    | 8    | 15      | 32            |
| Sierra Leone         | 17    | 1    | 23      | 17            | 6     | 41   | 15      | 5             |
| Côte d'Ivoire        | 26    | 1    | 37      | 23            | 50    | 67   | 55      | 50            |
| Gabon                | 51    | 41   | 67      | 43            | 70    | 20   | 82      | 64            |
| Liberia              | 15    | 0    | 21      | 15            | 12    | 51   | 22      | 10            |
| Eritrea              | 20    | 18   | 16      | 25            | 28    | 41   | 30      | 29            |
| Eq. Guinea           | 27    | 4    | 21      | 33            | 38    | 14   | 35      | 42            |
| Djibouti             | 11    | 13   | 9       | 13            | 25    | 22   | 32      | 26            |
| Somaliland           | 7     | 6    | 4       | 7             | 12    | 10   | 9       | 13            |
| W. Sahara            | 4     | -    | 3       | 4             | 3     | -    | 3       | 3             |
| Somalia              | 4     | 3    | 4       | 5             | 17    | 4    | 5       | 28            |

126 **References**

127 Ciais, P., Zhu, Y., Cai, Y., Lan, X., Michel, S. E., Zheng, B., Zhao, Y., Hauglustaine, D. A., Lin,  
128 X., Zhang, Y., Sun, S., Tian, X., Zhao, M., Wang, Y., Chang, J., Dou, X., Liu, Z., Andrew, R.,  
129 Quinn, C. A., Poulter, B., Ouyang, Z., Yuan, W., Yuan, K., Zhu, Q., Li, F., Pan, N., Tian, H., Yu,  
130 X., Rocher-Ros, G., Johnson, M. S., Li, M., Li, M., Feng, D., Raymond, P., Yang, X., Canadell, J.  
131 G., Jackson, R. B., Yu, X., Li, Y., Saunois, M., Bousquet, P., and Peng, S.: Why methane surged  
132 in the atmosphere during the early 2020s, *Science*, 391, eadx8262, doi:10.1126/science.adx8262,  
133 2026.

134 Liu, G., Shen, L., Ciais, P., Lin, X., Hauglustaine, D., Lan, X., Turner, A. J., Xi, Y., Zhu, Y., and  
135 Peng, S.: Trends in the seasonal amplitude of atmospheric methane, *Nature*, 641, 660-665,  
136 10.1038/s41586-025-08900-8, 2025.

137 Peng, S., Lin, X., Thompson, R. L., Xi, Y., Liu, G., Hauglustaine, D., Lan, X., Poulter, B., Ramonet,  
138 M., Saunois, M., Yin, Y., Zhang, Z., Zheng, B., and Ciais, P.: Wetland emission and atmospheric  
139 sink changes explain methane growth in 2020, *Nature*, 612, 477-482, 10.1038/s41586-022-05447-  
140 w, 2022.

141
